# Supplementary material for: Detection of polychlorinated benzenes (persistent organic pollutants) by a luminescent sensor based on a lanthanide metal–organic framework
Source: Royal Society of Chemistry journal article supplement (doi:10.1039/c7ta00256d), 2017-01-01
Supplement: c7ta00256d1.pdf [file c7ta00256d1.pdf]

# Electronic Supplementary Information (ESI)

## Detection of persistent organic pollutants of polychlorinated benzenes by a lanthanide metal-organic framework luminescent sensor

Lu Wang,<sup>a</sup> Guilan Fan,<sup>a</sup> Xiufang Xu,<sup>a</sup> Diming Chen,<sup>a</sup> Liang Wang,<sup>\*b</sup> Wei Shi<sup>\*acd</sup> and Peng Cheng<sup>\*acd</sup>

<sup>a</sup>Department of Chemistry, Key Laboratory of Advanced Energy Materials Chemistry(MOE), Nankai University, Tianjin 300071, China. E-mail: shiwei@nankai.edu.cn; pcheng@nankai.edu.cn

<sup>b</sup>State Key Laboratory of Separation Membranes and Membrane Processes, Tianjin Polytechnic University, Tianjin 300387, China

<sup>c</sup>State Key Laboratory of Elemento-Organic Chemistry, Nankai University, Tianjin 300071, China

<sup>d</sup>Collaborative Innovation Center of Chemical Science and Engineering (Tianjin), Nankai University, Tianjin 300071, China

### *Contents of ESI*

|                 |                                                                                                                                                                                                                                  |     |
|-----------------|----------------------------------------------------------------------------------------------------------------------------------------------------------------------------------------------------------------------------------|-----|
| <b>Table S1</b> | Crystal Data and Structural Refinement Parameters for Ln-MOF 1.                                                                                                                                                                  | p.3 |
| <b>Table S2</b> | Selected bond lengths (Å) and angles (°) for Ln-MOF 1.                                                                                                                                                                           | p.4 |
| <b>Fig. S1</b>  | Simulated and experimental powder X-ray diffraction patterns of Ln-MOF 1.                                                                                                                                                        | p.4 |
| <b>Fig. S2</b>  | Fourier transform infrared (FT-IR) spectrum of Ln-MOF 1.                                                                                                                                                                         | p.5 |
| <b>Fig. S3</b>  | Simplified topological structure of Ln-MOF 1.                                                                                                                                                                                    | p.5 |
| <b>Fig. S4</b>  | Thermal gravimetric analyses (TGA) curve of Ln-MOF 1.                                                                                                                                                                            | p.6 |
| <b>Fig. S5</b>  | The solid-state excitation and emission spectra with the excitation wavelength of 294 nm of Ln-MOF 1 at room temperature. Insert: the colors of Ln-MOF 1 before (above) and after (below) the irradiation of UV light of 254 nm. | p.6 |
| <b>Fig. S6</b>  | The solid-state excitation and emission spectra of H <sub>2</sub> L at room                                                                                                                                                      | p.7 |

temperature.

- Fig. S7** Powder X-ray diffraction patterns of Ln-MOF **1** after dissolved in different organic solvents. p.7
- Fig. S8** Luminescence quenching ( $I/I_0$ ) of Ln-MOF **1** (3 mg) dispersed in 3mL DMF with different organic solvents added when excited at 294 nm. p.8
- Fig. S9** (a) Suspension-state PL spectra and (b) the  $^5D_0 \rightarrow ^7F_2$  transition intensities of Ln-MOF **1** with different addition of chlorobenzene when excited at 294 nm. p.8
- Fig. S10** (a) Suspension-state PL spectra and (b) the  $^5D_0 \rightarrow ^7F_2$  transition intensities of Ln-MOF **1** with different addition of 1,4-dichlorobenzene when excited at 294 nm. p.9
- Fig. S11** (a) Suspension-state PL spectra and (b) the  $^5D_0 \rightarrow ^7F_2$  transition intensities of Ln-MOF **1** with different addition of 1,2,4-TCB when excited at 294 nm. p.9
- Fig. S12** (a) Suspension-state PL spectra and (b) the  $^5D_0 \rightarrow ^7F_2$  transition intensities of Ln-MOF **1** with different addition of 1,2,3,4-TCB when excited at 294 nm. p.9
- Fig. S13** (a) Suspension-state PL spectra and (b) the  $^5D_0 \rightarrow ^7F_2$  transition intensities of Ln-MOF **1** with different addition of 1,2,4,5-TCB when excited at 294 nm. p.10
- Fig. S14** (a) Suspension-state PL spectra and (b) the  $^5D_0 \rightarrow ^7F_2$  transition intensities of Ln-MOF **1** with different addition of PeCB when excited at 294 nm. p.10
- Fig. S15** (a) Suspension-state PL spectra and (b) the  $^5D_0 \rightarrow ^7F_2$  transition intensities of Ln-MOF **1** with different addition of HCB when excited at 294 nm. p.10

|                     |                                                                                                                                                                                                                                                                                                  |         |
|---------------------|--------------------------------------------------------------------------------------------------------------------------------------------------------------------------------------------------------------------------------------------------------------------------------------------------|---------|
| <b>Fig. S16</b>     | Reproducibility of the quenching ability of Ln-MOF <b>1</b> for 1,2,4-TCB with five continuous quenching cycles.                                                                                                                                                                                 | p.11    |
| <b>Fig. S17</b>     | Molecular structures and sizes of polychlorinated benzenes.                                                                                                                                                                                                                                      | p.11    |
| <b>Fig. S18</b>     | HOMO and LUMO energies calculated for ligand H <sub>2</sub> L and polychlorinated benzenes.                                                                                                                                                                                                      | p.12    |
| <b>Fig. S19</b>     | The UV-vis absorption spectra for chlorobenzene, 1,2-dichlorobenzene, 1,2,4-TCB (a), 1,2,3,4-TCB, 1,2,4,5-TCB, PeCB, HCB and H <sub>2</sub> L (c); comparison of PL spectra of Ln-MOF <b>1</b> before and after adding 1,2,4-TCB (1.25%) (b), 1,2,3,4-TCB, 1,2,4,5-TCB, PeCB, HCB (4.00 mM) (d). | p.12    |
| <b>Tables S3–S9</b> | The Cartesian Coordinates of the stationary points discussed in this paper.                                                                                                                                                                                                                      | p.13-17 |

**Table S1.** Crystal data and structural refinement parameters for Ln-MOF **1**.

| <b>1</b>                                                        |                                                                                 |
|-----------------------------------------------------------------|---------------------------------------------------------------------------------|
| Formula                                                         | C <sub>40</sub> H <sub>40</sub> N <sub>12</sub> O <sub>16</sub> Eu <sub>2</sub> |
| F.M                                                             | 1248.74                                                                         |
| T /K                                                            | 122                                                                             |
| Crystal system                                                  | Monoclinic                                                                      |
| Space group                                                     | <i>I</i> 2/ <i>a</i>                                                            |
| <i>a</i> / Å                                                    | 17.4164(6)                                                                      |
| <i>b</i> / Å                                                    | 14.2453(4)                                                                      |
| <i>c</i> / Å                                                    | 20.4424(7)                                                                      |
| $\alpha$ /°                                                     | 90.00                                                                           |
| $\beta$ /°                                                      | 114.512(4)                                                                      |
| $\gamma$ /°                                                     | 90.00                                                                           |
| V/ Å <sup>3</sup>                                               | 4614.7(3)                                                                       |
| <i>Z</i>                                                        | 4                                                                               |
| $\mu$ /mm <sup>-1</sup>                                         | 2.765                                                                           |
| Reflns collected                                                | 9331                                                                            |
| Independ. reflns                                                | 4063                                                                            |
| <i>R</i> <sub>int</sub>                                         | 0.0389                                                                          |
| <i>R</i> <sub>1</sub> <sup>a</sup> ( <i>I</i> > 2σ( <i>I</i> )) | 0.0282                                                                          |
| <i>wR</i> <sub>2</sub> <sup>a</sup> (all data)                  | 0.0536                                                                          |
| GOF                                                             | 1.002                                                                           |

$${}^a R_1 = \frac{\sum ||F_0| - |Fc||}{\sum |F_0|}, \quad {}^b wR_2 = \left[ \frac{\sum w(F_0^2 - F_c^2)^2}{\sum w(F_0^2)^2} \right]^{1/2}.$$



**Table S2.** Selected bond lengths (Å) and angles (°) for Ln-MOF **1**.

| <b>1</b> |          |             |            |             |            |
|----------|----------|-------------|------------|-------------|------------|
| Eu1-O6   | 2.387(5) | O6-Eu1-N7   | 73.49(16)  | O12-Eu1-O9  | 107.33(16) |
| Eu1-N7   | 2.581(5) | O6-Eu1-O8   | 133.25(16) | O22-Eu1-O6  | 124.08(17) |
| Eu1-O8   | 2.474(4) | O6-Eu1-O9   | 82.70(16)  | O22-Eu1-N7  | 148.39(18) |
| Eu1-O9   | 2.501(4) | O6-Eu1-O11  | 77.66(16)  | O22-Eu1-O8  | 86.50(16)  |
| Eu1-O11  | 2.401(4) | O6-Eu1-O12  | 141.47(18) | O22-Eu1-O9  | 133.29(16) |
| Eu1-O12  | 2.404(5) | O8-Eu1-N7   | 99.08(16)  | O22-Eu1-O11 | 78.64(16)  |
| Eu1-O22  | 2.297(5) | O8-Eu1-O9   | 52.62(15)  | O22-Eu1-O12 | 76.24(19)  |
| Eu1-O26  | 2.333(4) | O9-Eu1-N7   | 69.69(15)  | O22-Eu1-O26 | 74.9(2)    |
|          |          | O11-Eu1-N7  | 80.61(15)  | O26-Eu1-O6  | 78.75(19)  |
|          |          | O11-Eu1-O8  | 148.06(15) | O26-Eu1-N7  | 136.76(19) |
|          |          | O11-Eu1-O9  | 148.04(15) | O26-Eu1-O8  | 76.76(16)  |
|          |          | O11-Eu1-O12 | 75.15(16)  | O26-Eu1-O9  | 74.49(17)  |
|          |          | O12-Eu1-N7  | 75.55(17)  | O26-Eu1-O11 | 124.88(17) |
|          |          | O12-Eu1-O8  | 73.91(16)  | O26-Eu1-O12 | 139.63(19) |

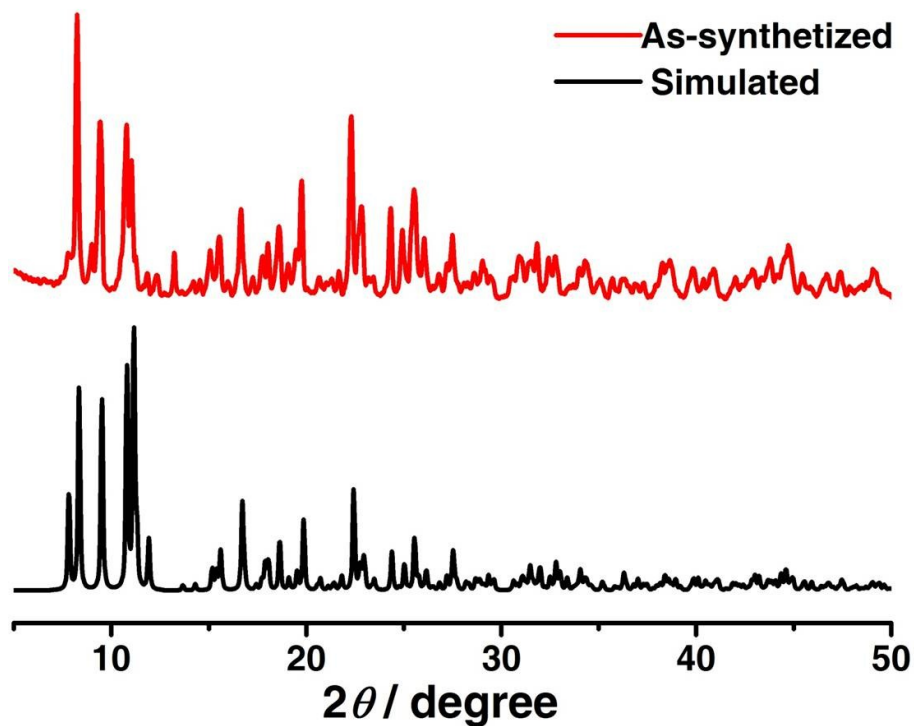**Fig. S1** Simulated and experimental powder X-ray diffraction patterns of Ln-MOF **1**.

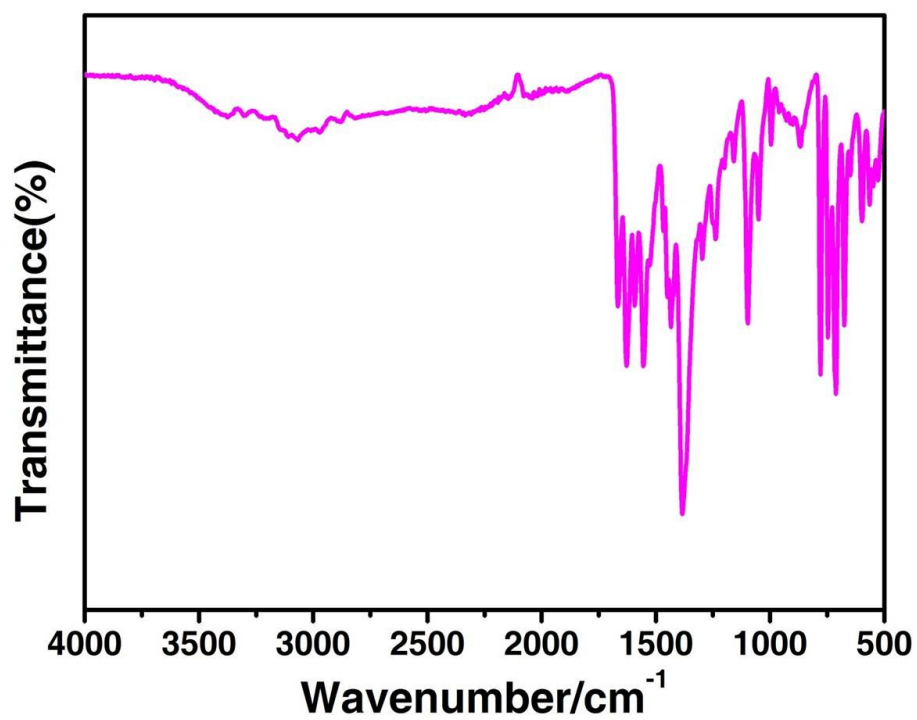

**Fig. S2** Fourier transform infrared (FT-IR) spectrum of Ln-MOF **1**.

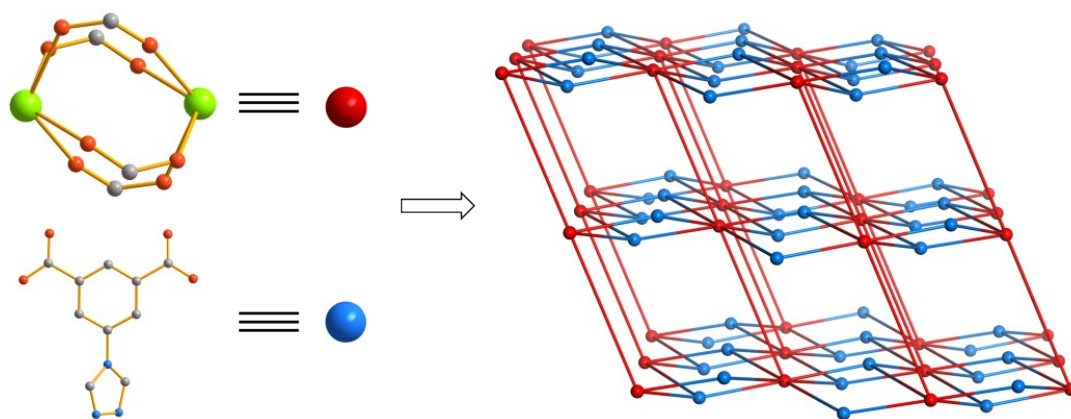

**Fig. S3** Simplified topological structure of Ln-MOF **1**: (red)  $\text{Ln}_2$  binuclear unit; (blue)  $\text{L}^2$  ligand.

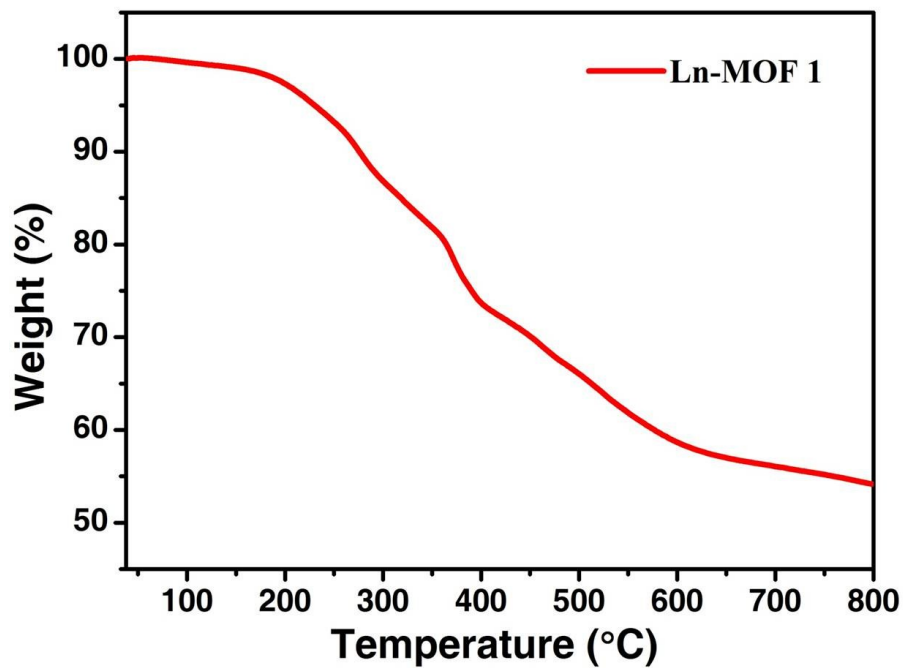

Fig. S4 Thermal gravimetric analyses (TGA) curve of Ln-MOF 1.

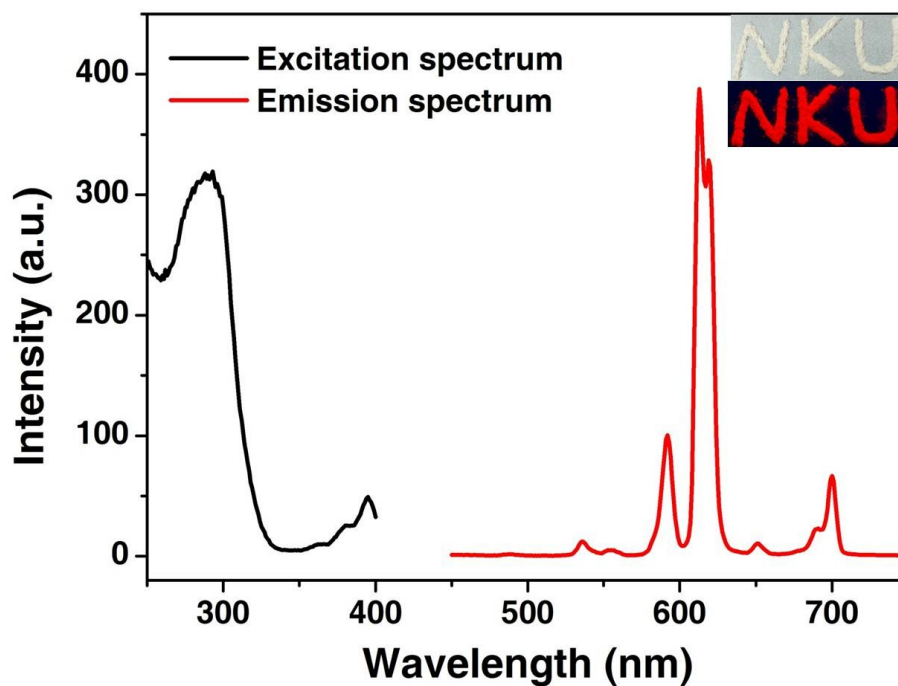

Fig. S5 The solid-state excitation and emission spectra with the excitation wavelength of 294 nm of Ln-MOF 1 at room temperature. Insert: the colors of Ln-MOF 1 before (above) and after (below) the irradiation of UV light of 254 nm.

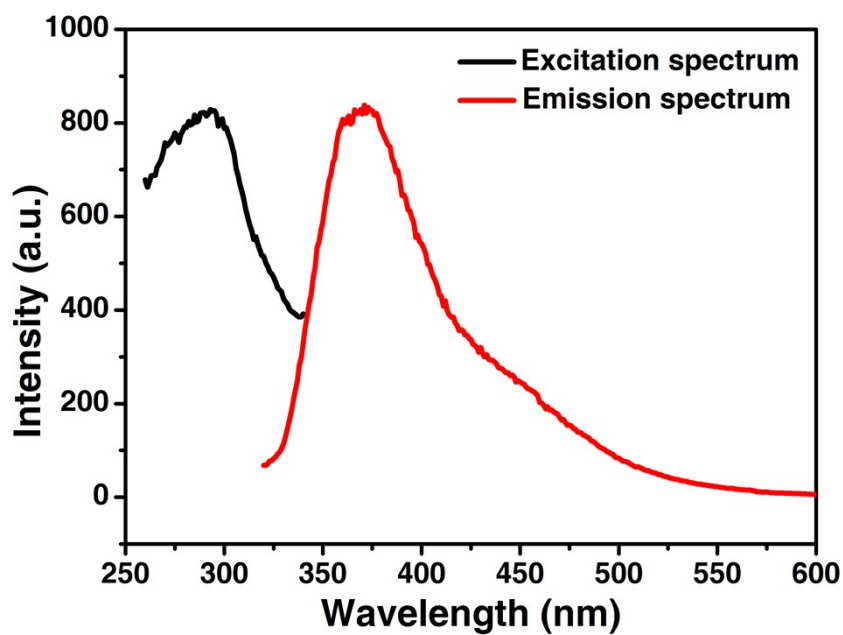

**Fig. S6** The solid-state excitation and emission spectra of H<sub>2</sub>L at room temperature.

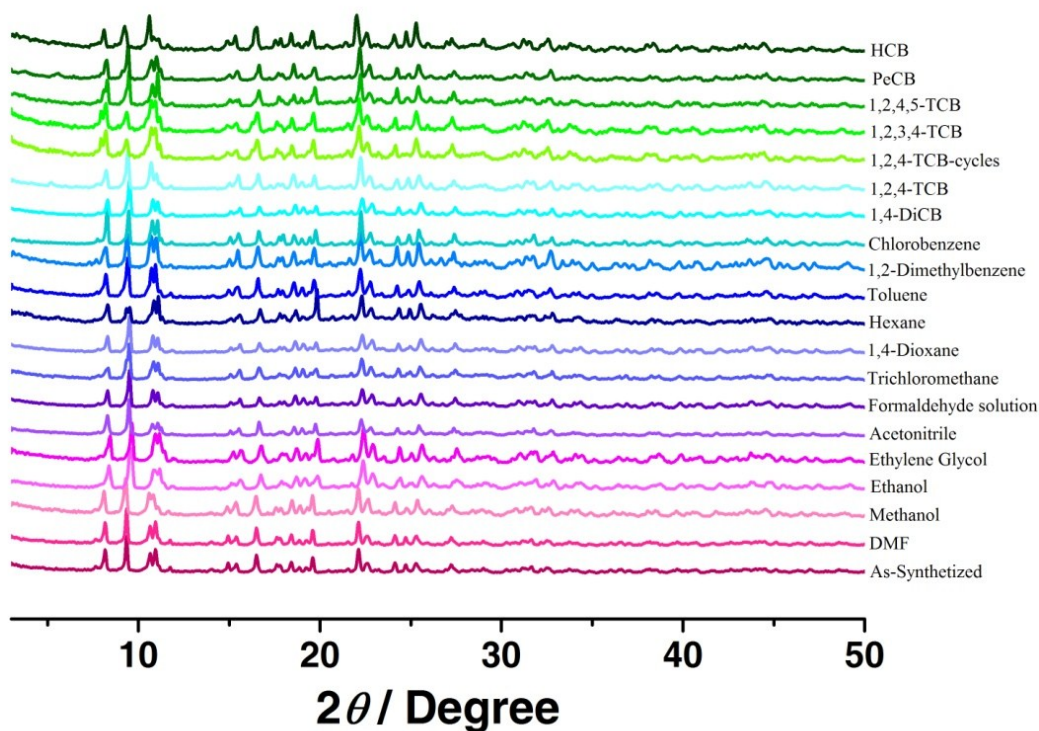

**Fig. S7** Powder X-ray diffraction patterns of Ln-MOF 1 after immersing in different organic solvents.



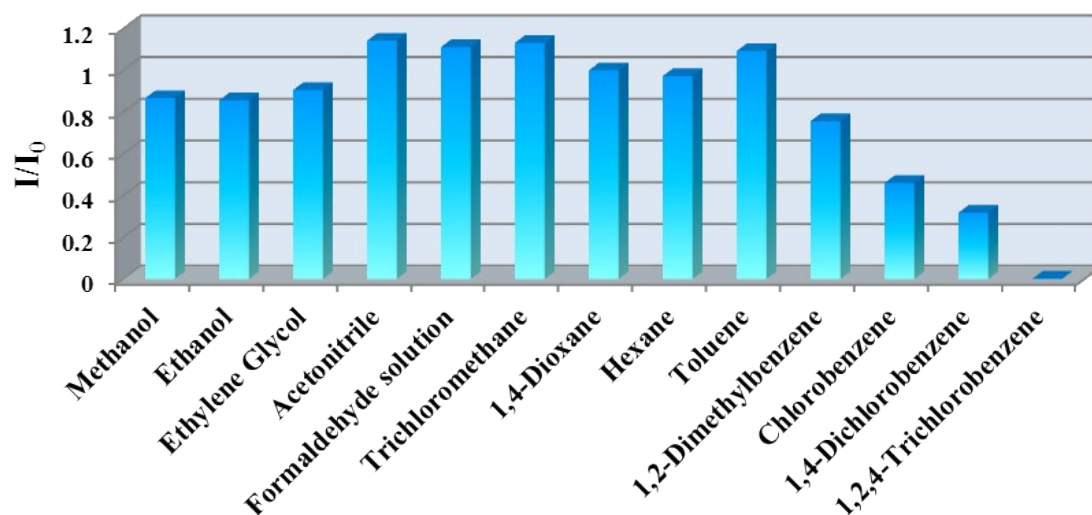

**Fig. S8** Luminescence quenching ( $I/I_0$ ) of Ln-MOF **1** (3 mg) dispersed in 3 mL DMF with different organic solvents added when excited at 294 nm.

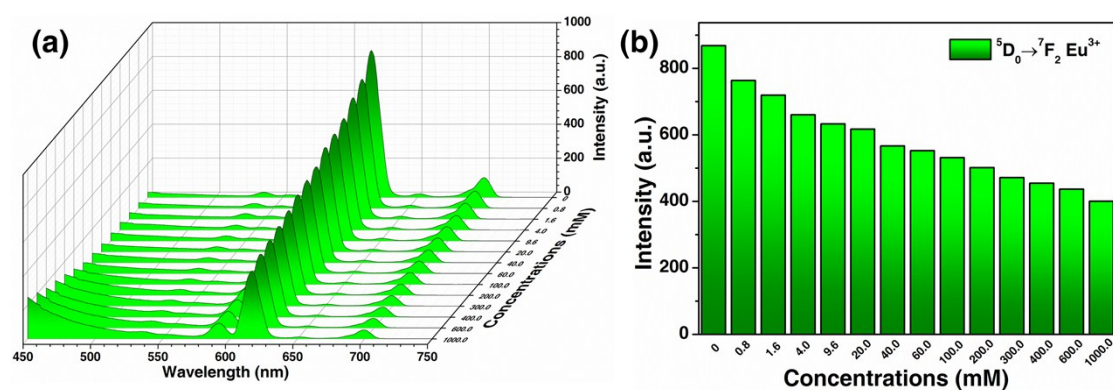

**Fig. S9** (a) Suspension-state PL spectra and (b) the  $^5D_0 \rightarrow ^7F_2$  transition intensities of Ln-MOF **1** with different addition of chlorobenzene when excited at 294 nm.

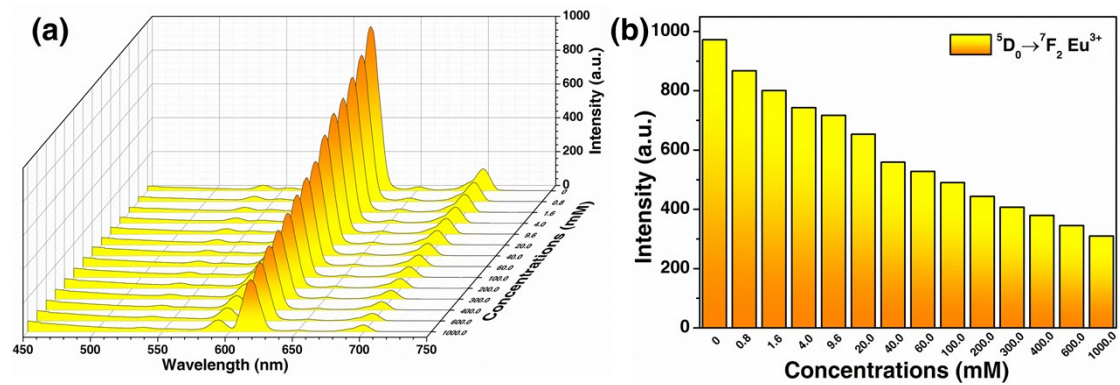

**Fig. S10** (a) Suspension-state PL spectra and (b) the  $^5D_0 \rightarrow ^7F_2$  transition intensities of Ln-MOF **1** with different addition of 1,4-dichlorobenzene when excited at 294 nm.

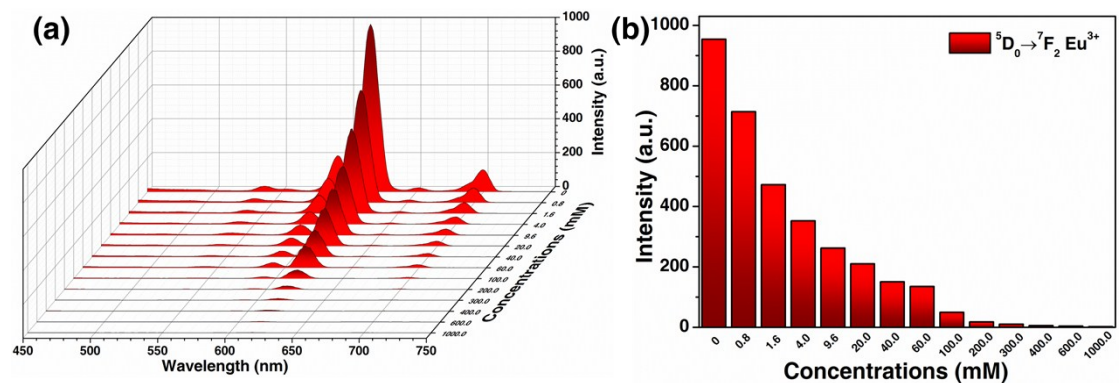

**Fig. S11** (a) Suspension-state PL spectra and (b) the  $^5D_0 \rightarrow ^7F_2$  transition intensities of Ln-MOF **1** with different addition of 1,2,4-TCB when excited at 294 nm.

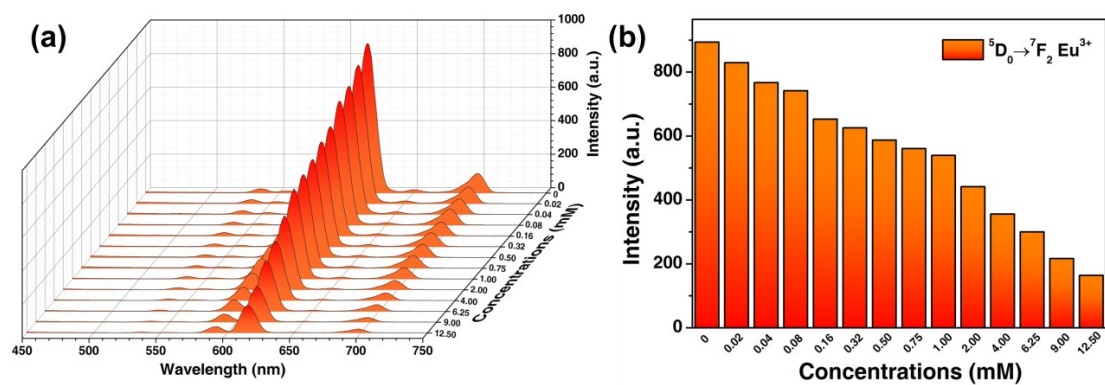

**Fig. S12** (a) Suspension-state PL spectra and (b) the  $^5D_0 \rightarrow ^7F_2$  transition intensities of Ln-MOF **1** with different addition of 1,2,3,4-TCB when excited at 294 nm.

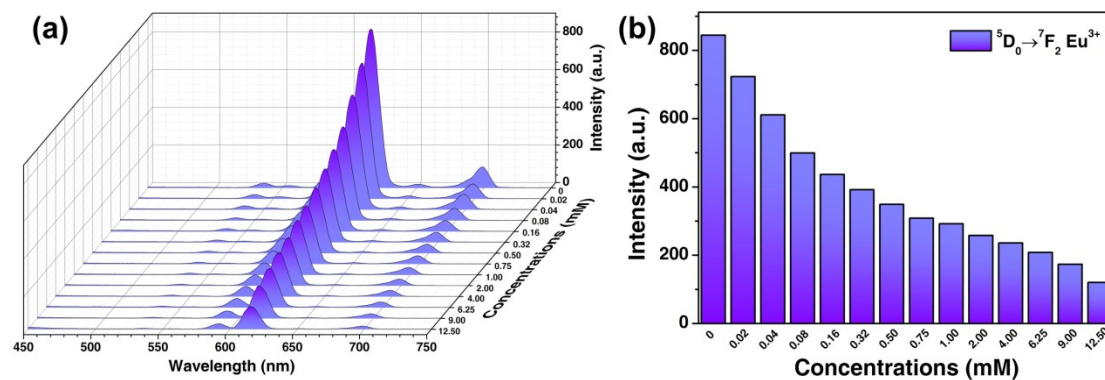

**Fig. S13** (a) Suspension-state PL spectra and (b) the  $^5D_0 \rightarrow ^7F_2$  transition intensities of Ln-MOF **1** with different addition of 1,2,4,5-TCB when excited at 294 nm.

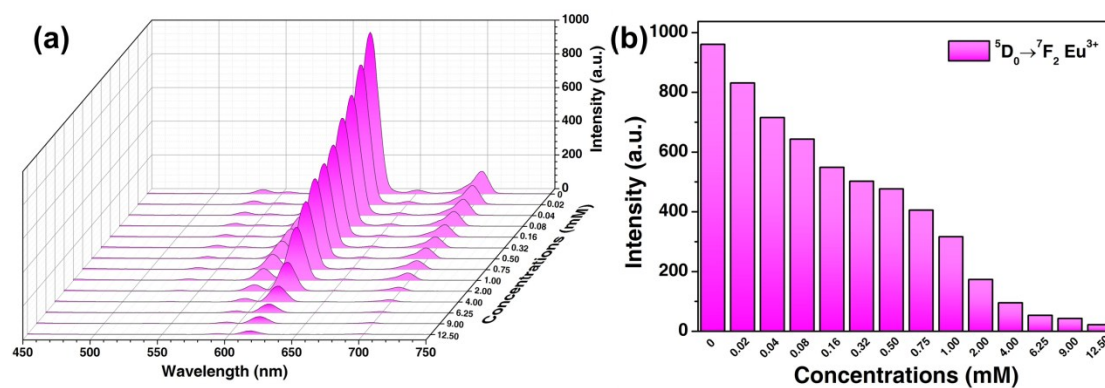

**Fig. S14** (a) Suspension-state PL spectra and (b) the  $^5D_0 \rightarrow ^7F_2$  transition intensities of Ln-MOF **1** with different addition of PeCB when excited at 294 nm.

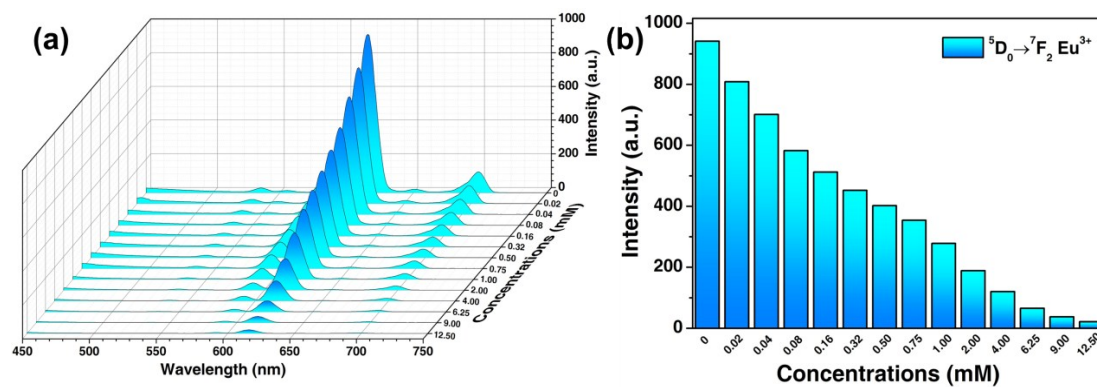

**Fig. S15** (a) Suspension-state PL spectra and (b) the  $^5D_0 \rightarrow ^7F_2$  transition intensities of Ln-MOF 1 with different addition of HCB when excited at 294 nm.

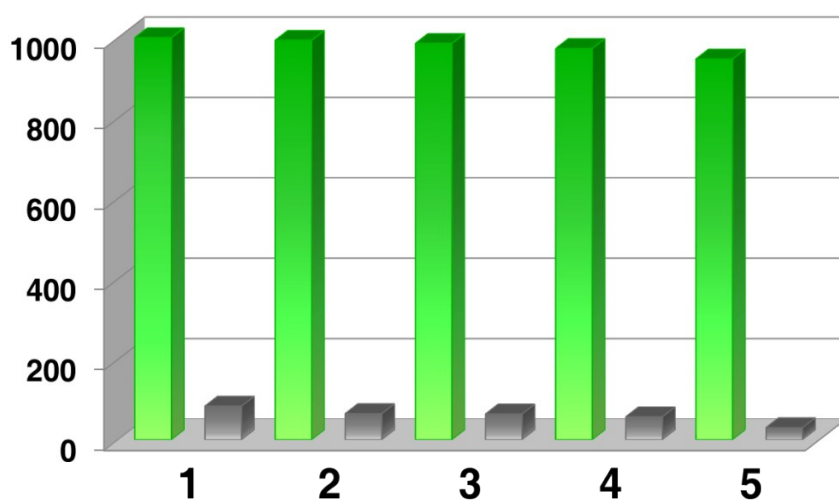

**Fig. S16** Reproducibility of the quenching ability of Ln-MOF 1 for 1,2,4-TCB with five continuous quenching cycles.

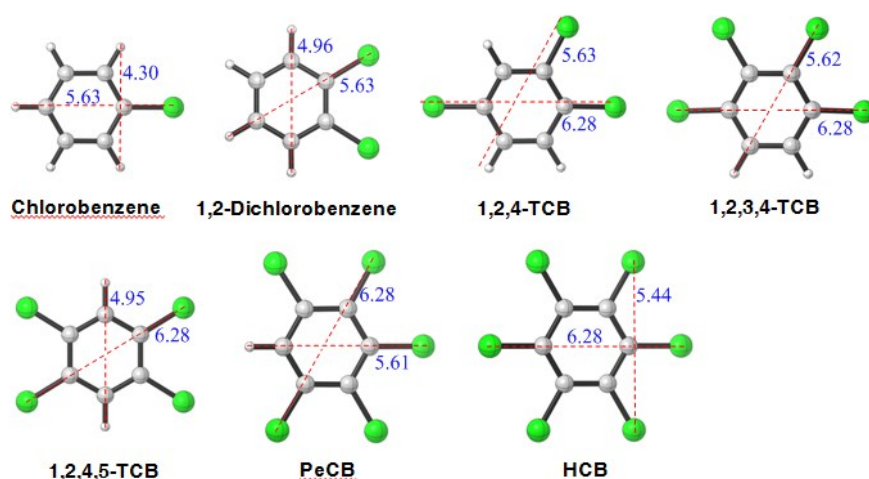

Fig. S17 Molecular structures and sizes of polychlorinated benzenes.

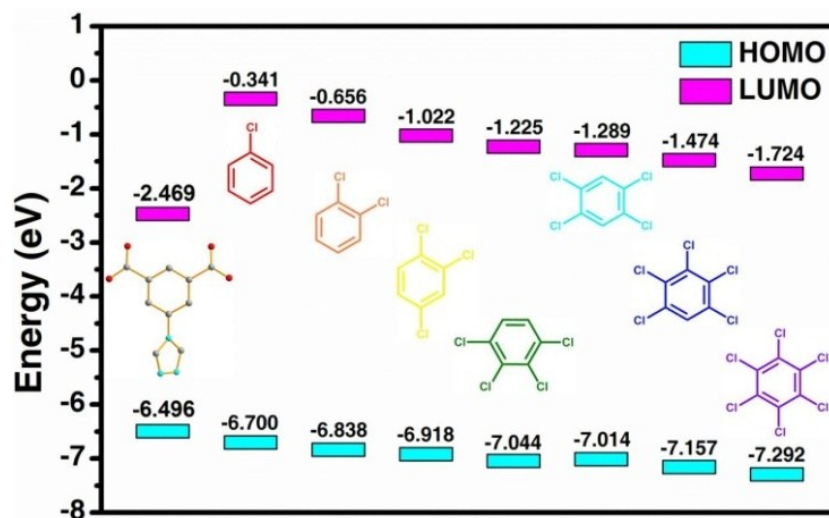

Fig. S18 HOMO and LUMO energies calculated for ligand H<sub>2</sub>L and polychlorinated benzenes.

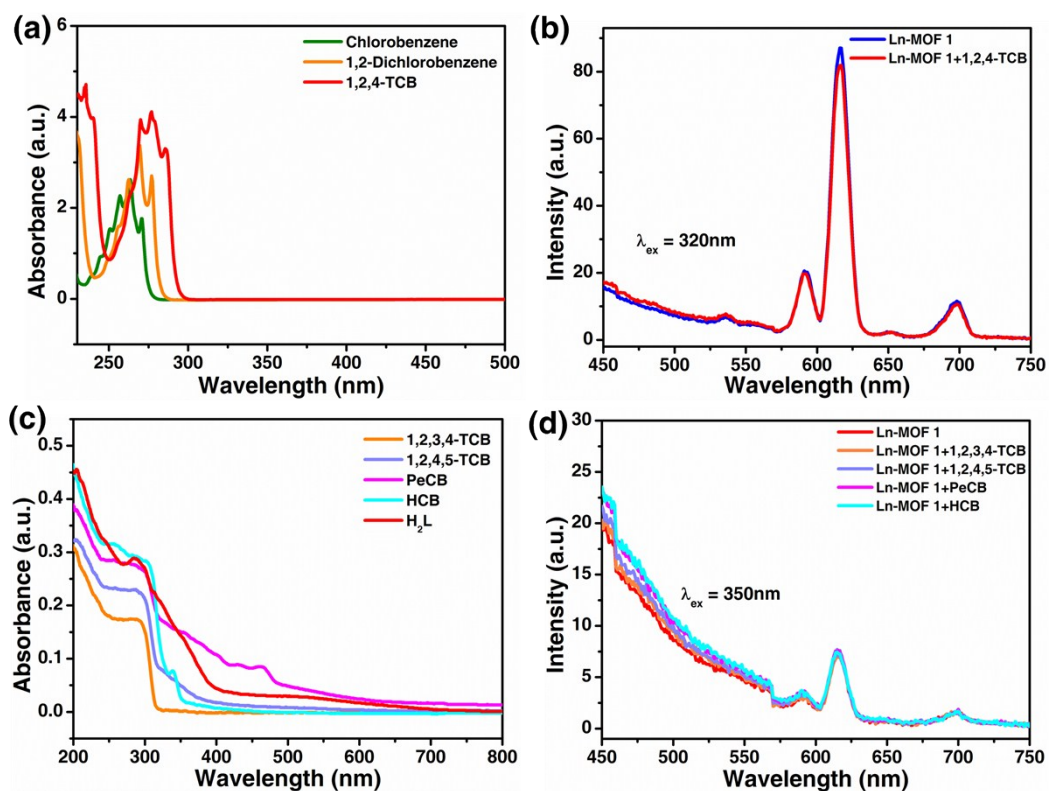

Fig. S19 The UV-vis absorption spectra for chlorobenzene, 1,2-dichlorobenzene, 1,2,4-TCB (a), 1,2,3,4-TCB, 1,2,4,5-TCB, PeCB, HCB and H<sub>2</sub>L (c); comparison of

PL spectra of Ln-MOF **1** before and after adding 1,2,4-TCB (1.25%) (b), 1,2,3,4-TCB, 1,2,4,5-TCB, PeCB, HCB (4.00 mM) (d).

### DFT Calculation.

The geometries of all minima were fully optimized in gas phase using the hybrid B3LYP<sup>1</sup> functional. The 6-31G(d) basis set was employed for all atoms except for Eu. The large core ECP52MWB<sup>2</sup> optimized by the Stuttgart/Cologne group was used for uranium centers. Frequency calculations were performed at 298.15 K to verify that the stationary points were the local minima. All of the calculations were performed with Gaussian 09.<sup>3</sup>

**Tables S3–S9.** The Cartesian Coordinates of the stationary points discussed in this paper.

For all minimum structures, no imaginary frequency was observed.

**Table S3. Chlorobenzene**

| Atom | X         | Y         | Z         |
|------|-----------|-----------|-----------|
| C    | -1.574505 | -1.207803 | 0.000000  |
| C    | -0.178309 | -1.216394 | 0.000000  |
| C    | 0.504285  | 0.000000  | 0.000000  |
| C    | -0.178309 | 1.216394  | 0.000000  |
| C    | -1.574505 | 1.207803  | -0.000000 |
| C    | -2.275148 | 0.000000  | 0.000000  |
| H    | -2.112520 | -2.151833 | -0.000000 |
| H    | 0.374772  | -2.149683 | -0.000000 |
| H    | 0.374772  | 2.149683  | 0.000000  |
| H    | -2.112520 | 2.151833  | -0.000000 |
| H    | -3.361301 | 0.000000  | -0.000000 |
| Cl   | 2.264455  | 0.000000  | -0.000000 |

**Table S4. 1,2-Dichlorobenzene**

| Atom | X         | Y         | Z         |
|------|-----------|-----------|-----------|
| C    | 0.000000  | 2.392333  | 0.697816  |
| C    | -0.000000 | 1.185558  | 1.394869  |
| C    | 0.000000  | -0.027127 | 0.700823  |
| C    | 0.000000  | -0.027127 | -0.700823 |
| C    | 0.000000  | 1.185558  | -1.394869 |
| C    | 0.000000  | 2.392333  | -0.697816 |
| H    | -0.000000 | 3.328481  | 1.248168  |
| H    | -0.000000 | 1.169473  | 2.479526  |
| H    | -0.000000 | 1.169473  | -2.479526 |
| H    | -0.000000 | 3.328481  | -1.248168 |
| Cl   | -0.000000 | -1.517796 | 1.613147  |
| Cl   | -0.000000 | -1.517796 | -1.613147 |

**Table S5. 1,2,4-TCB**

| Atom | X         | Y         | Z         |
|------|-----------|-----------|-----------|
| C    | -1.724824 | -0.146562 | -0.000000 |
| C    | -0.811558 | 0.904996  | -0.000000 |
| C    | 0.557015  | 0.625186  | -0.000000 |
| C    | 1.003376  | -0.703799 | -0.000000 |
| C    | 0.069940  | -1.743064 | -0.000000 |
| C    | -1.296264 | -1.473514 | -0.000000 |
| H    | -1.151513 | 1.933561  | 0.000000  |
| H    | 0.423255  | -2.768520 | 0.000000  |
| H    | -2.017019 | -2.283389 | 0.000000  |
| Cl   | 1.676028  | 1.963104  | 0.000000  |
| Cl   | 2.702985  | -1.096880 | 0.000000  |
| Cl   | -3.440239 | 0.212534  | 0.000000  |

**Table S6. 1,2,3,4-TCB**

| Atom | X         | Y         | Z         |
|------|-----------|-----------|-----------|
| C    | -1.395435 | -0.817966 | -0.000000 |
| C    | -0.704667 | 0.404342  | -0.000000 |
| C    | 0.704667  | 0.404342  | -0.000000 |
| C    | 1.395435  | -0.817966 | -0.000000 |
| C    | 0.694632  | -2.023501 | -0.000000 |
| C    | -0.694632 | -2.023501 | -0.000000 |
| H    | 1.243971  | -2.958230 | 0.000000  |
| Cl   | 1.577259  | 1.904245  | 0.000000  |
| Cl   | 3.138080  | -0.870070 | 0.000000  |
| Cl   | -3.138080 | -0.870070 | 0.000000  |
| H    | -1.243971 | -2.958230 | 0.000000  |
| Cl   | -1.577259 | 1.904245  | 0.000000  |

**Table S7. 1,2,4,5-TCB**

| Atom | X         | Y         | Z         |
|------|-----------|-----------|-----------|
| C    | 1.211775  | -0.700870 | -0.000000 |
| C    | 0.000000  | -1.391210 | -0.000000 |
| C    | -1.211775 | -0.700870 | -0.000000 |
| C    | -1.211775 | 0.700870  | -0.000000 |
| C    | -0.000000 | 1.391210  | -0.000000 |
| C    | 1.211775  | 0.700870  | -0.000000 |
| H    | 0.000000  | -2.474552 | 0.000000  |
| H    | -0.000000 | 2.474552  | 0.000000  |
| Cl   | -2.693739 | -1.616140 | 0.000000  |
| Cl   | -2.693739 | 1.616140  | 0.000000  |
| Cl   | 2.693739  | -1.616140 | 0.000000  |
| Cl   | 2.693739  | 1.616140  | 0.000000  |



**Table S8. PeCB**

| Atom | X         | Y         | Z         |
|------|-----------|-----------|-----------|
| C    | -1.206324 | -1.100770 | -0.000000 |
| C    | -1.222307 | 0.302216  | -0.000000 |
| C    | 0.000000  | 1.000312  | -0.000000 |
| C    | 1.222307  | 0.302216  | -0.000000 |
| C    | 1.206324  | -1.100770 | -0.000000 |
| C    | 0.000000  | -1.794747 | -0.000000 |
| Cl   | 0.000000  | 2.734474  | 0.000000  |
| Cl   | 2.727550  | 1.162537  | 0.000000  |
| Cl   | -2.683187 | -2.023102 | 0.000000  |
| H    | 0.000000  | -2.877608 | -0.000000 |
| Cl   | -2.727550 | 1.162537  | 0.000000  |
| Cl   | 2.683187  | -2.023102 | 0.000000  |

**Table S9. HCB**

| Atom | X         | Y         | Z         |
|------|-----------|-----------|-----------|
| C    | 1.403655  | -0.054786 | 0.000000  |
| C    | 0.654528  | -1.243185 | 0.000001  |
| C    | -0.749261 | -1.188303 | 0.000001  |
| C    | -1.403655 | 0.054786  | 0.000001  |
| C    | -0.654528 | 1.243185  | -0.000000 |
| C    | 0.749261  | 1.188303  | -0.000000 |
| Cl   | -1.674228 | -2.654387 | 0.000001  |
| Cl   | -3.135747 | 0.121849  | -0.000001 |
| Cl   | 3.135747  | -0.121849 | 0.000001  |
| Cl   | 1.462601  | -2.777156 | -0.000001 |
| Cl   | -1.462601 | 2.777156  | 0.000001  |
| Cl   | 1.674228  | 2.654387  | -0.000001 |

**References**

1. (a) A. D. Becke, *Phys. Rev. A.*, 1988, **38**, 3098; (b) C. Lee, W. Yang, R. G. Parr,

- Phys. Rev. B.*, 1988, **37**, 785; (c) A. D. Becke, *J. Chem. Phys.*, 1993, **98**, 5648; (d) A. D. Becke, *J. Chem. Phys.*, 1993, **98**, 1372; (e) P. J. Stephens, F. J. Devlin, M. J. Frisch, C. F. Chabalowski, *J. Phys. Chem.*, 1994, **98**, 11623.
2. (a) M. Dolg, H. Stoll, A. Savin, H. Preuss, *Theor. Chim. Acta*, 1989, **75**, 173; (b) M. Dolg, H. Stoll, H. Preuss, *Theor. Chim. Acta*, 1993, **85**, 441.
  3. M. J. Frisch, G. W. Trucks, H. B. Schlegel, G. E. Scuseria, M. A. Robb, J. R. Cheeseman, G. Scalmani, V. Barone, B. Mennucci, G. A. Petersson, H. Nakatsuji, M. Caricato, X. Li, H. P. Hratchian, A. F. Izmaylov, J. Bloino, G. Zheng, J. L. Sonnenberg, M. Hada, M. Ehara, K. Toyota, R. Fukuda, J. Hasegawa, M. Ishida, T. Nakajima, Y. Honda, O. Kitao, H. Nakai, T. Vreven, J. A. Montgomery, Jr., J. E. Peralta, F. Ogliaro, M. Bearpark, J. J. Heyd, E. Brothers, K. N. Kudin, V. N. Staroverov, T. Keith, R. Kobayashi, J. Normand, K. Raghavachari, A. Rendell, J. C. Burant, S. S. Iyengar, J. Tomasi, M. Cossi, N. Rega, J. M. Millam, M. Klene, J. E. Knox, J. B. Cross, V. Bakken, C. Adamo, J. Jaramillo, R. Gomperts, R. E. Stratmann, O. Yazyev, A. J. Austin, R. Cammi, C. Pomelli, J. W. Ochterski, R. L. Martin, K. Morokuma, V. G. Zakrzewski, G. A. Voth, P. Salvador, J. J. Dannenberg, S. Dapprich, A. D. Daniels, O. Farkas, J. B. Foresman, J. V. Ortiz, J. Cioslowski, D. J. Fox, *Gaussian 09*, Revision E.01, Wallingford CT, 2013.
